# Supplementary material for: Driving factors for the activity coefficient of atmospheric ammonium nitrate: discrepancies among thermodynamic models and impact on nitrate pollutions
Source: Copernicus journal article supplement (doi:10.5194/egusphere-2025-5754), 2025-11-25
Supplement: Supplementary file 1 [file egusphere-2025-5754-supplement.pdf]

## **Support Information:**

### **Driving factors for the activity coefficient of atmospheric ammonium nitrate: discrepancies among thermodynamic models and impact on nitrate pollutions**

Ruilin Wan, Guangjie Zheng\*, Yuyang Li, Xiaolin Duan, Jingkun Jiang, and Kebin He

#### **Affiliations**

State Key Laboratory of Regional Environment and Sustainability, School of Environment, Tsinghua University, Beijing 100084, China

**Correspond to:** G. Zheng ([zgj123@mail.tsinghua.edu.cn](mailto:zgj123@mail.tsinghua.edu.cn))

This 17-page PDF file contains:

- Supplementary Text S1 - S3
- Figure S1 - S9
- Table S1 - S3
- Additional References

## Supplementary Text

### S1 Influence of $\gamma_{AN}^2$ on nitrate partitioning in ISORROPIA

For the  $\text{NH}_3\text{-H}_2\text{SO}_4\text{-HNO}_3\text{-H}_2\text{O}$  system, ISORROPIA operates under subcase “D3”. When a small amount of  $\text{Na}^+$  is introduced, forming  $\text{Na}^+\text{-NH}_3\text{-H}_2\text{SO}_4\text{-HNO}_3\text{-H}_2\text{O}$  system, the calculation procedure of ISORROPIA shifts from “D3” to “G5”. In both subcases  $\gamma_{AN}^2$  plays a critical role when solving  $\text{HNO}_3\text{-NO}_3^-$  gas-particle partitioning and is detailed in Zheng’s previous study<sup>1</sup>.

Briefly, for the subcase “D3”, the major equilibriums considered is the gas-particle partitioning of ammonia and nitrates, which are:

$$C_1 = \frac{[\text{NO}_3^-(aq)][\text{NH}_4^+(aq)]}{[\text{HNO}_3(g)][\text{NH}_3(g)]} = \frac{K_{ag,\text{HNO}_3}}{K_{ag,\text{NH}_3}\gamma_{AN}^2} \quad (\text{Eq. S1})$$

As shown in the equation, the only activity coefficients that matters in solving of  $\text{NH}_3\text{-H}_2\text{SO}_4\text{-HNO}_3\text{-H}_2\text{O}$  is  $\gamma_{AN}^2$  in  $C_1$ .

For the subcase “G5”, the major equilibriums considered are the gas-particle partitioning of  $\text{NH}_3$ ,  $\text{HNO}_3$  and  $\text{HCl}$ , which are:

$$C_2 = \frac{[\text{NO}_3^-(aq)][\text{HCl}(g)]}{[\text{Cl}^-(aq)][\text{HNO}_3(g)]} = \frac{K_{ag,\text{HNO}_3}}{K_{ag,\text{HCl}}} \frac{\gamma_{\text{H-Cl}}^2}{\gamma_{\text{H-NO}_3}^2} \quad (\text{Eq. S2})$$

$$[\text{NH}_4^+(aq)]^2 - B[\text{NH}_4^+(aq)] + C = 0 \quad (\text{Eq. S3})$$

where

$$B = [\text{NH}_3]_t + [\text{Na}^+] - 2[\text{H}_2\text{SO}_4]_t + [\text{Cl}^-(aq)] + [\text{NO}_3^-(aq)] + C_3^{-1}$$

$$C = [\text{NH}_3]_t + [\text{Na}^+] - 2([\text{H}_2\text{SO}_4]_t)([\text{Cl}^-(\text{aq})] + [\text{NO}_3^-(\text{aq})]) - C_3^{-1}(2[\text{H}_2\text{SO}_4]_t - [\text{Na}^+]).$$

The  $[\text{NH}_4^+(\text{aq})]$  is associated with  $\text{Cl}^-(\text{aq})$  and  $\text{NO}_3^-(\text{aq})$ , whose solution includes  $C_3 = \frac{\gamma_{H-\text{NO}_3(\text{aq})}^2}{K_{ag, \text{NH}_3} \gamma_{AN}^2}$  as shown in Zheng's work<sup>(1)</sup>. Therefore,  $\gamma_{AN}^2$  also matters in solving gas-particle partitioning of  $\text{Na}^+$ - $\text{NH}_3$ - $\text{H}_2\text{SO}_4$ - $\text{HNO}_3$ - $\text{H}_2\text{O}$  system.

## **S2 Comparison of $\gamma_{AN}^2$ of AIOMFAC with E-AIM and ISORROPIA as input**

The  $\gamma_{AN}^2$  outputs of AIOMFAC with ISORROPIA and E-AIM as input respectively are compared in Fig. S1(a), which proved that there's no significant difference when the two models' outputs are as inputs. However, the presence of non-zero  $\text{Na}^+$  in inputs in  $\text{Na}^+$ - $\text{NH}_3$ - $\text{H}_2\text{SO}_4$ - $\text{HNO}_3$ - $\text{H}_2\text{O}$  scenario triggers ISORROPIA to invoke the ISRP3F subroutine, which is automatically activated when either  $\text{Na}^+$  or  $\text{Cl}$  is present in the input<sup>2</sup>. Consequently, ISORROPIA produces outputs that violate ion mass balance, with  $\text{Cl}^-$  appearing in the output despite being absent from the input. In contrast, this issue does not occur in E-AIM.

## **S3 Comparison of related variables**

As depicted in Fig.S2a~c, for the estimation of ionic strength  $IS$ ,  $f_{\text{NVC}}$ , and  $f_{\text{NO}_3^-}$ , the results obtained from AIOMFAC show perfect consistency with those from E-AIM. Since the AIOMFAC model does not require RH data as input, it calculates the system RH at equilibrium thermodynamically. Therefore, comparing the RH consistency

between AIOMFAC and E-AIM can serve as an indirect assessment of the accuracy of the AIOMFAC model. As shown in Fig. S2d, for RH estimation, AIOMFAC and E-AIM show overall consistency. However, the discrepancy between the two expands as RH decreases, with better agreement at higher RH and larger discrepancies at lower RH. ISORROPIA results align well with E-AIM for the estimation of  $f_{\text{NVC}}$  and  $f_{\text{NO}_3^-}$ , as illustrated in Fig. S2f, g. For IS estimation, ISORROPIA demonstrates a certain degree of underestimation (see Fig. S2e). Ridge regression analysis reveals that the differences in IS between the two models are primarily due to discrepancies in the estimation of semi-volatile species such as  $\text{NO}_3^-$  and  $\text{NH}_4^+$ , and partially ionized substance pair, i.e.,  $\text{HSO}_4^-$  and  $\text{SO}_4^{2-}$  (see Fig. S3-4).

## Supplementary Figures

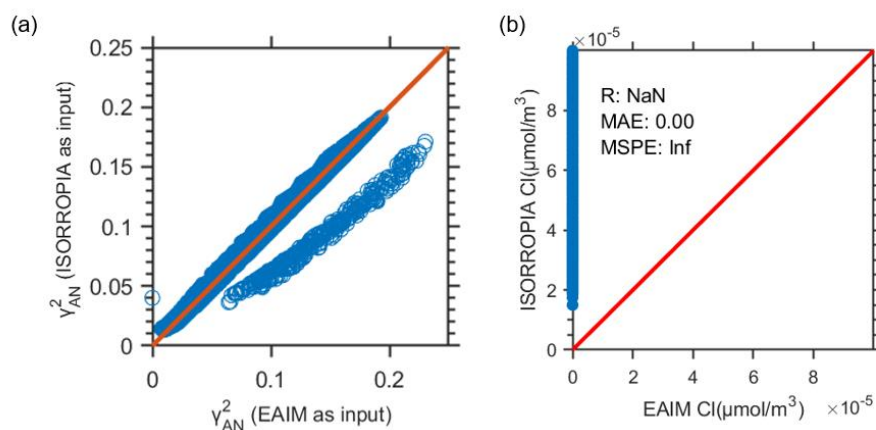

**Figure S1.** (a)  $\gamma_{AN}^2$  calculated by AIOMFAC with different inputs from E-AIM and ISORROPIA output in Scenario Met. The distinguishing differentiated branch corresponds to the IS differentiated branch shown in Fig. S2e. (b) Comparison of output  $Cl^-$  concentration ( $\mu\text{mol}/\text{m}^3$ ) between ISORROPIA and E-AIM.

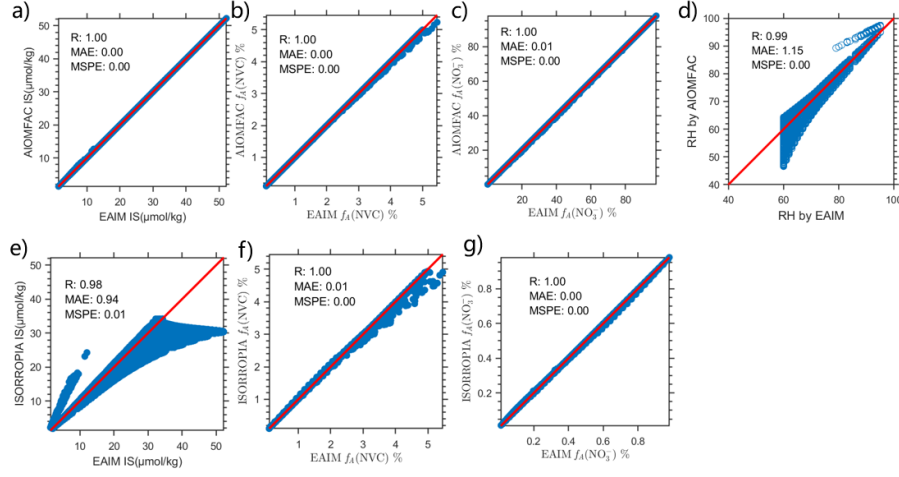

**Figure 1.** Scenario Met. related variables comparisons. Comparison (a ~ d) between AIOMFAC and E-AIM; (e ~ g) ISORROPIA and E-AIM in ionic strength IS (mol/kg), non-volatile cation fraction in anions  $f_{NVC}$ , nitrate fraction in anions  $f_{NO_3^-}$  and RH. R refers to Pearson correlation coefficient; MAE stands for mean absolute error; MSPE is short for mean squared percentage error.

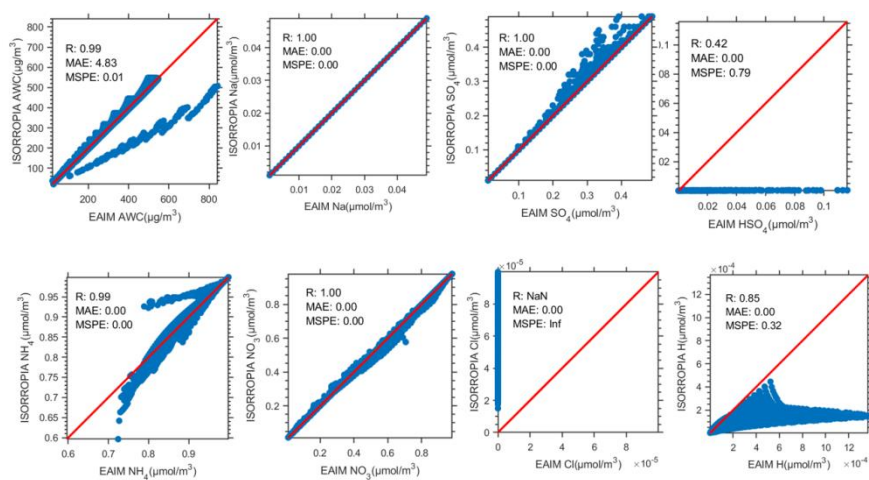

**Figure S3.** Comparison of species concentration estimated by ISORROPIA and E-AIM for Scenario Met.

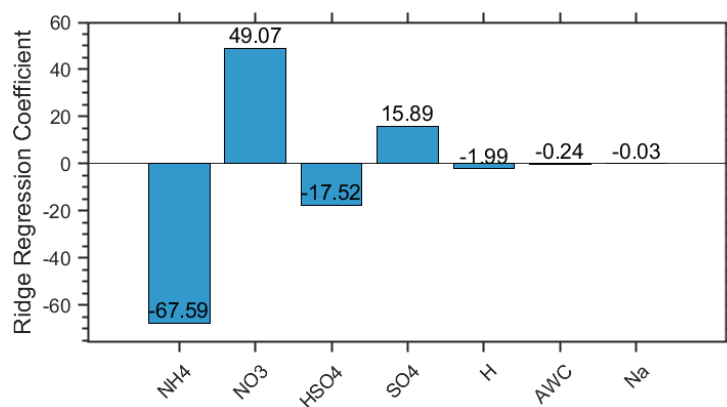

**Figure S4.** Ridge regression analysis of IS difference dominant influencing factors. Lamda choose 0.01 by using k-fold cross validation. Ridge regression coefficients representing the relative contributions of variable differences to IS difference. Positive coefficients (e.g., NO<sub>3</sub> and SO<sub>4</sub>) indicate a positive association with IS difference, while negative coefficients (e.g., NH<sub>4</sub> and HSO<sub>4</sub>) indicate a negative association. The magnitude reflects the strength of each variable's influence after standardization and regularization.



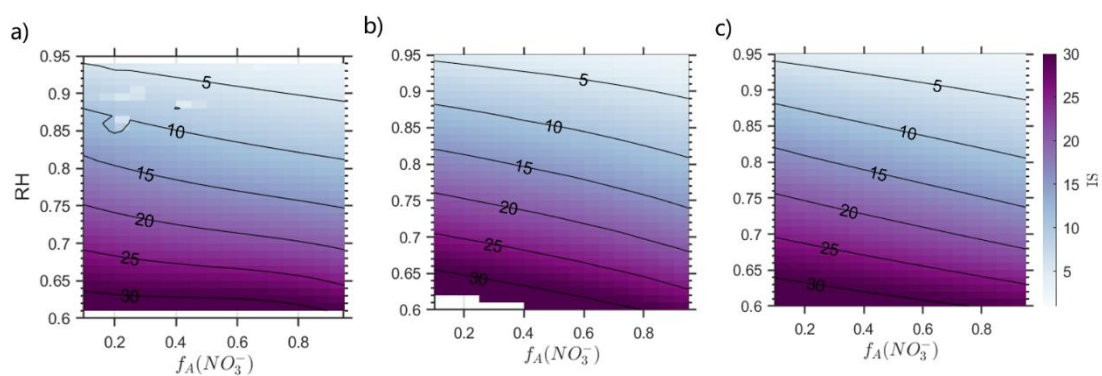

**Figure S5.** IS for Scenario Met. simulation under different  $f_{\text{NO}_3^-}$  and RH estimated by

(a) E-AIM; (b) AIOMFAC; (c) ISORROPIA.  $T = 288\text{K}$ .

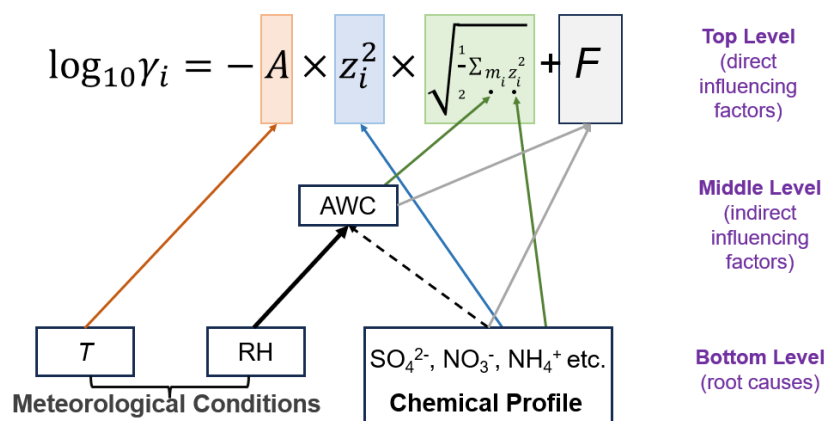

**Figure S6.** Hierarchical relationship among influencing factors of  $\gamma_i$  based on Debye-Hückel equation as established with the interpretive structural modeling approach. IS =  $\frac{1}{2} \sum m_i z_i^2$  (see main text Eq.5).

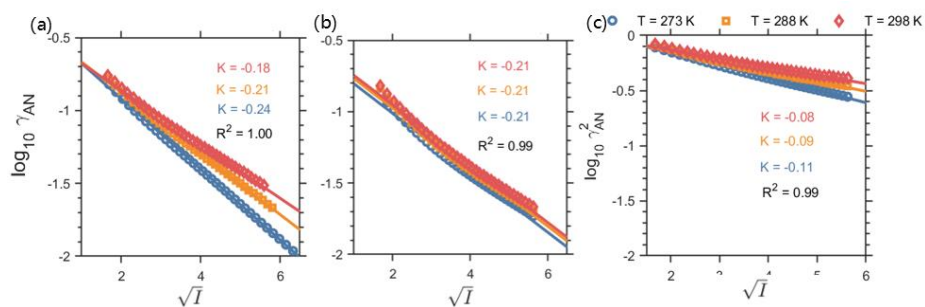

**Figure S7.** Dependence of  $\gamma_{\text{AN}}$  to IS in (a) E-AIM; (b) AIOMFAC; (c) ISORROPIA.

By fixing the component concentration at  $f_{\text{NO}_3}=0.25$ ,  $T=273\text{K}$ ,  $288\text{K}$  and  $298\text{K}$  are divided into lower temperature, medium temperature and higher temperature.

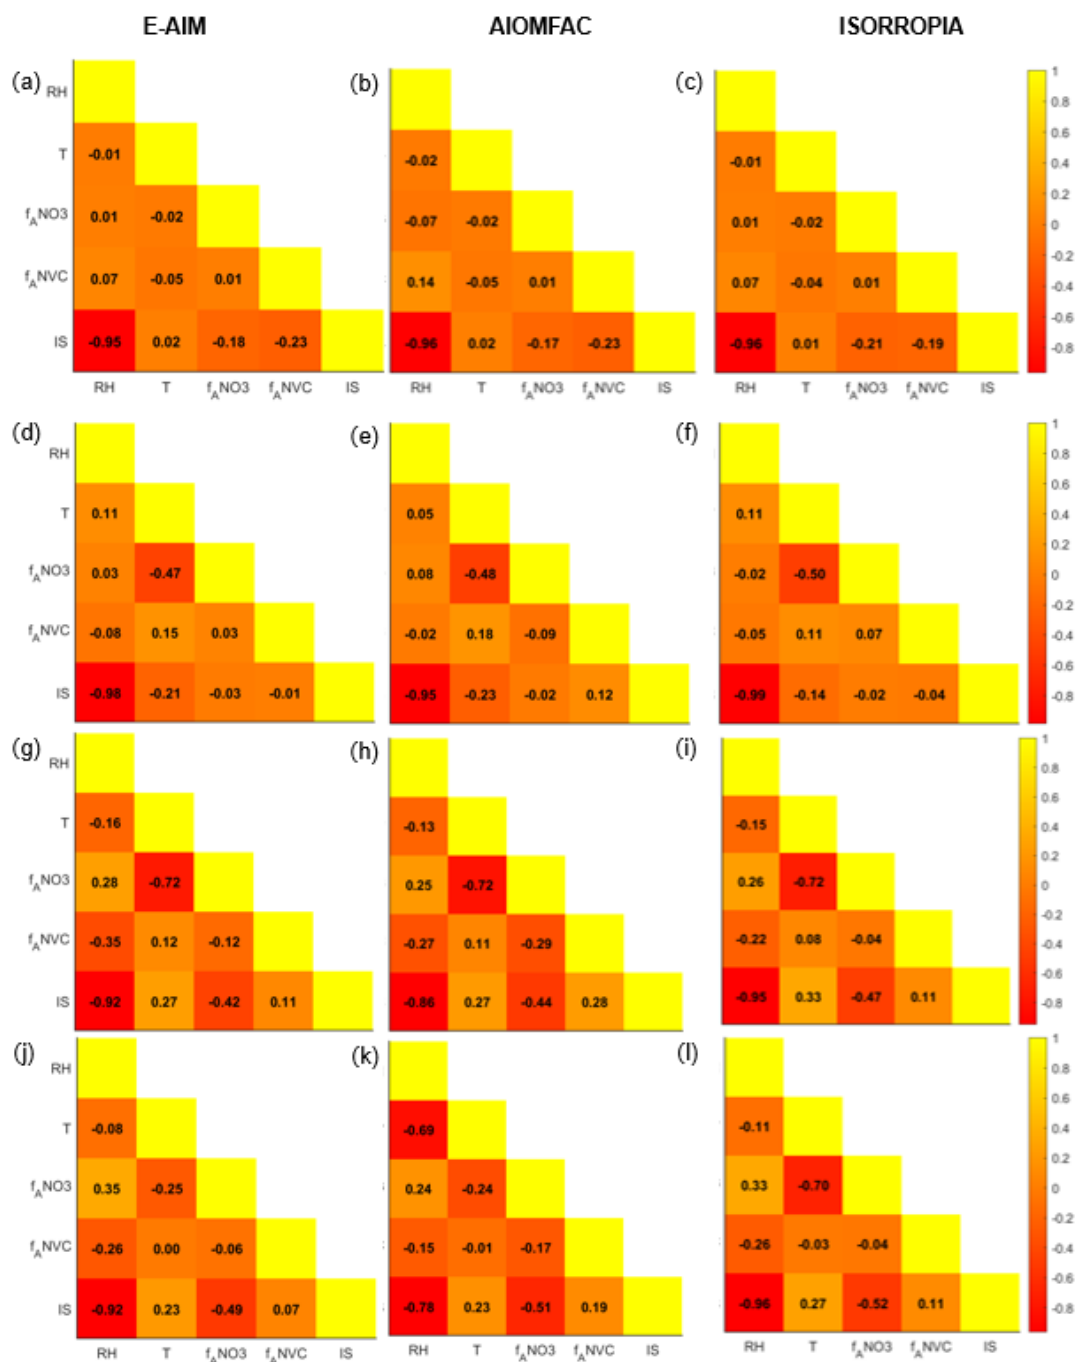

**Figure S8.** Relative influencing factors coefficients for (a ~ c) simulation data based on Scenario Full; (d ~ f) USA; (g ~ i) Canada; (j ~ l) China. The left, middle, and right columns correspond to the results from E-AIM, AIOMFAC, and ISORROPIA, respectively.

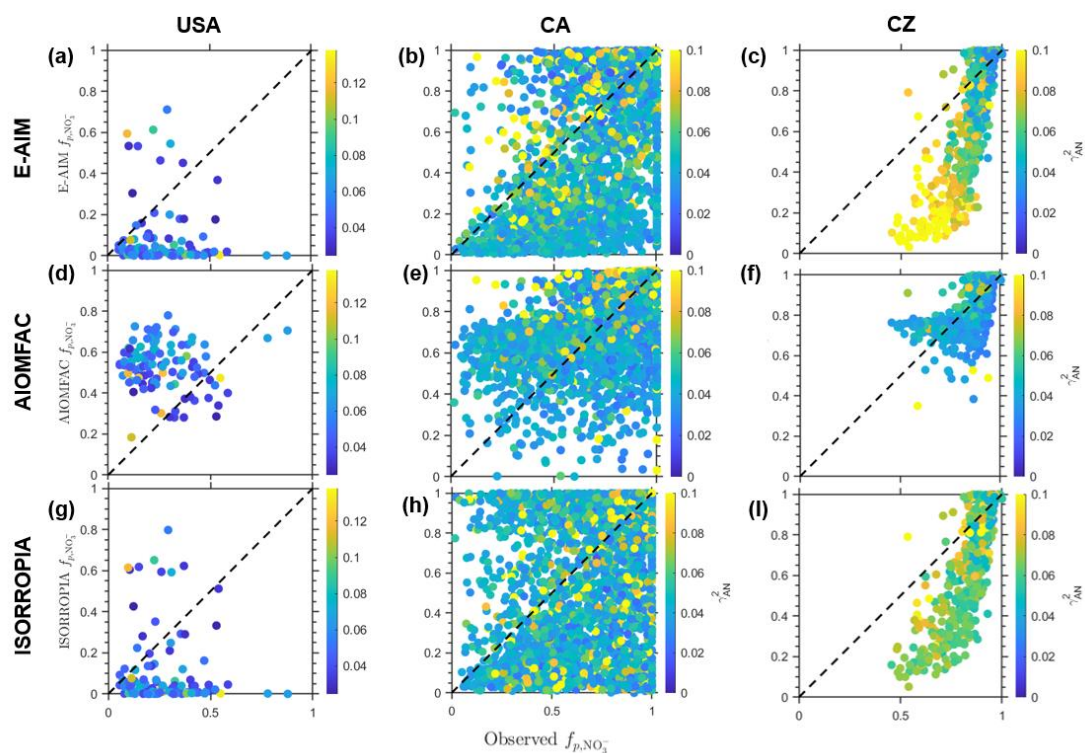

**Figure S9. Comparisons of  $f_p\text{NO}_3^-$  estimated by (a ~ c) E-AIM; (d ~ f) AIOMFAC; (g ~ i) ISORROPIA and observational data.** The left, middle, and right panels correspond to the USA, Canada, and China, respectively. The scatter points are color-coded according to the model-predicted values of  $\gamma_{AN}^2$ .

## Supplementary Tables

**Table S1. Gibbs Energies of Formation**

| Substance and Physical state | $\mu^0, aq(g)_i(\text{J} \cdot \text{mol}^{-1})$ |
|------------------------------|--------------------------------------------------|
| <b>HNO<sub>3</sub>, g</b>    | -73.54                                           |
| <b>HNO<sub>3</sub>, aq</b>   | -111.34                                          |
| <b>H<sup>+</sup>, aq</b>     | 0                                                |

The following apply:

$$K_{HNO_3} = \exp\left(\frac{\mu^0, g_{HNO_3} - \mu^0, aq_{NO_3^-} - \mu^0, aq_{H^+}}{RT}\right)$$

where  $\mu^0, aq(g)_i(\text{J} \cdot \text{mol}^{-1})$  is the Gibbs Energy of Formation of species  $i$ ,  $R$  ( $\text{J} \cdot \text{K}^{-1} \cdot \text{mol}^{-1}$ ) is the universal gas constant,  $T(\text{K})$  is temperature.

**Table S2.** Long-term observations of atmospheric composition and gas pollutants in three sites. All concentrations were averaged daily with the unit of  $\mu\text{g}/\text{m}^3$ .

| <b>Sites</b>                               | <b>Centreville, US</b>         | <b>Six sites in Canada</b>     | <b>Changzhou, China</b>                       |
|--------------------------------------------|--------------------------------|--------------------------------|-----------------------------------------------|
| <b>Period</b>                              | 2010, 2012~2016                | 2007~2016                      | 2018~2023                                     |
| <b>Gas pollutants</b>                      | $\text{NH}_3$ , $\text{HNO}_3$ | $\text{NH}_3$ , $\text{HNO}_3$ | $\text{NH}_3$ , $\text{HNO}_3$ , $\text{HCl}$ |
| <b>Equivalent <math>\text{Na}^+</math></b> | 0.13                           | 0.14                           | 0.08                                          |
| <b><math>\text{SO}_4^{2-}</math></b>       | 1.80                           | 1.67                           | 1.28                                          |
| <b><math>\text{NH}_3</math>, tot</b>       | 0.54                           | 2.50                           | 2.31                                          |
| <b><math>\text{HNO}_3</math>, tot</b>      | 0.22                           | 1.67                           | 1.07                                          |
| <b><math>\text{Cl}^-</math></b>            | 0.04                           | 0.03                           | 0.03                                          |
| <b>Average RH</b>                          | 0.77                           | 0.76                           | 0.79                                          |
| <b>Average temperature</b>                 | 293.20                         | 283.13                         | 282.01                                        |
| <b>Valid data number</b>                   | 504                            | 3549                           | 516                                           |
| <b>Ref.</b>                                | 3,4                            | 5                              | 6                                             |

**Table S3.** Comparison of  $\gamma_{AN}^2$  sensitivity to cations and anions. Data are based on Scenario Chem.

| RH  | E-AIM               |                  | AIOMFAC             |                  | ISORROPIA           |                  |
|-----|---------------------|------------------|---------------------|------------------|---------------------|------------------|
|     | Mean sensitivity    | Mean sensitivity | Mean sensitivity    | Mean sensitivity | Mean sensitivity    | Mean sensitivity |
|     | $f_{\text{NO}_3^-}$ | $f_{\text{NVC}}$ | $f_{\text{NO}_3^-}$ | $f_{\text{NVC}}$ | $f_{\text{NO}_3^-}$ | $f_{\text{NVC}}$ |
| 60% | 0.16                | 0.08             | 0.02                | 0.03             | 0.01                | 0.04             |
| 75% | 0.12                | 0.06             | 0.01                | 0.03             | 0.01                | 0.04             |
| 90% | 0.13                | 0.12             | 0.13                | 0.12             | 0.05                | 0.04             |

\* “mean sensitivity” refers to the mean value of absolute  $\frac{\partial \gamma_{AN}^2}{\partial f_{\text{NO}_3^-}} \left( \frac{\partial \gamma_{AN}^2}{\partial f_{\text{NVC}}} \right)$ .



### Additional Reference:

1. Zheng, G., Su, H., Wang, S., Pozzer, A. & Cheng, Y. Impact of non-ideality on reconstructing spatial and temporal variations in aerosol acidity with multiphase buffer theory. *Atmos. Chem. Phys.* **22**, 47–63 (2022).
2. Fountoukis, C. & Nenes, A. ISORROPIA II: a computationally efficient thermodynamic equilibrium model for  $K^+ - Ca^{2+} - Mg^{2+} - NH_4^+ - Na^+ - SO_4^{2-} - NO_3^- - Cl^- - H_2O$  aerosols. *Atmospheric Chemistry and Physics* **7**, 4639–4659 (2007).
3. Edgerton, E. S. *et al.* The Southeastern Aerosol Research and Characterization Study, Part 3: Continuous Measurements of Fine Particulate Matter Mass and Composition. *Journal of the Air & Waste Management Association* **56**, 1325–1341 (2006).
4. Hansen, D. A. *et al.* The Southeastern Aerosol Research and Characterization Study: Part 1—Overview. *Journal of the Air & Waste Management Association* **53**, 1460–1471 (2003).
5. Tao, Y. & Murphy, J. G. The sensitivity of  $PM_{2.5}$  acidity to meteorological parameters and chemical composition changes: 10-year records from six Canadian monitoring sites. *Atmos. Chem. Phys.* **19**, 9309–9320 (2019).
6. Duan, X., Zheng, G., Chen, C., Zhang, Q. & He, K. Driving factors of aerosol acidity: a new hierarchical quantitative analysis framework and its application in Changzhou, China. Preprint at <https://doi.org/10.5194/egusphere-2024-3584> (2024).
